# Supplementary material for: NK Cell Activation in Human Hantavirus Infection Explained by Virus-Induced IL-15/IL15Rα Expression
Source: PubMed Central journal article supplement (PMC4239055; doi:10.1371/journal.ppat.1004521), 2014-11-20

A

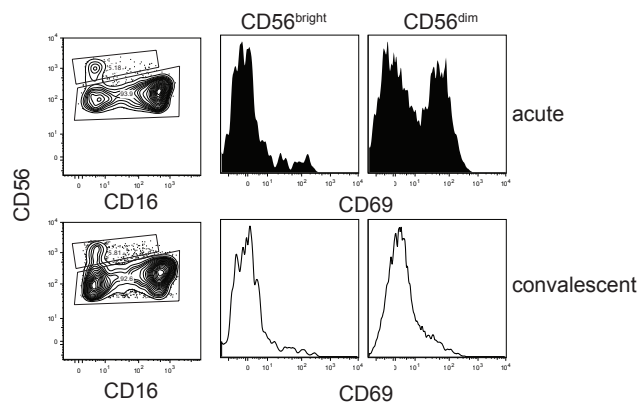

B

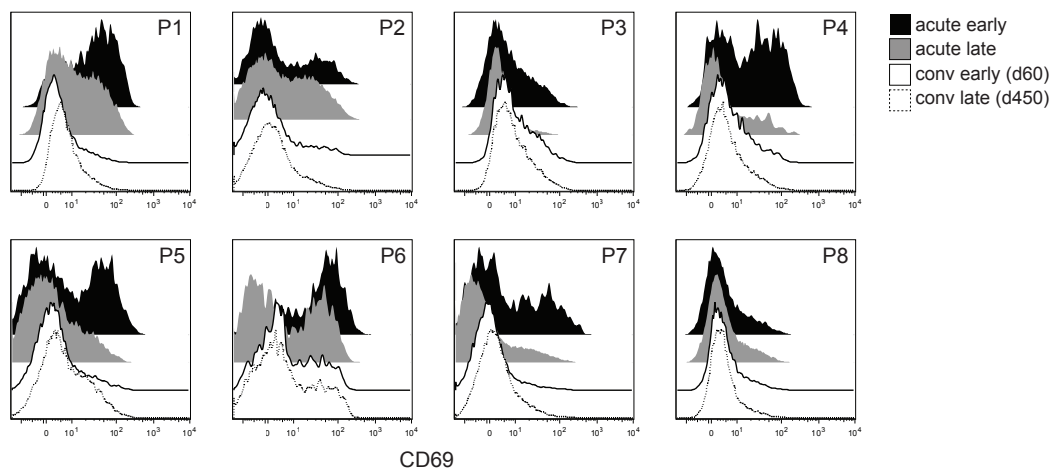

Supplement: ppat.1004521.s001.pdf [file ppat.1004521.s001.pdf]
