# Supplementary material for: NK Cell Activation in Human Hantavirus Infection Explained by Virus-Induced IL-15/IL15Rα Expression
Source: PubMed Central journal article supplement (PMC4239055; doi:10.1371/journal.ppat.1004521), 2014-11-20

□ uninfected epithelial cells  
■ HTNV-infected epithelial cells

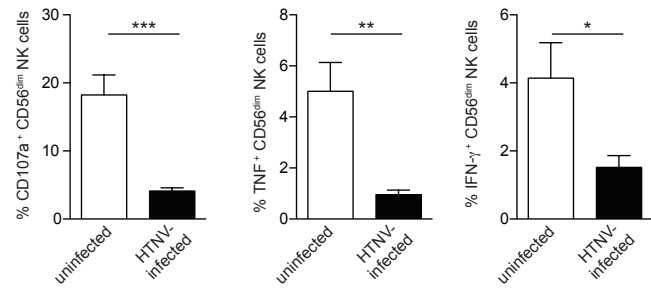

Supplement: ppat.1004521.s004.pdf [file ppat.1004521.s004.pdf]
